1 **Body size and climate as predictors of plumage colouration and**  
2 **sexual dichromatism in parrots**

3 Short running title: **Predictors of plumage colouration in parrots**

4 Luisana Carballo<sup>1</sup>, Kaspar Delhey<sup>1,2</sup>, Mihai Valcu<sup>1</sup> & Bart Kempenaers<sup>1</sup>

5 <sup>1</sup>Department of Behavioural Ecology and Evolutionary Genetics, Max Planck Institute for Ornithology,  
6 Seewiesen, Germany

7 <sup>2</sup>School of Biological Sciences, Monash University, Clayton, Vic. 3800, Australia

8

9 Correspondence: Luisana Carballo, Department of Behavioural Ecology and Evolutionary Genetics, Max  
10 Planck Institute for Ornithology, 82319 Seewiesen, Germany. Tel.: +49 (0) 8157 932 450; email:  
11 lcarballo@orn.mpg.d

12

13

14

15

16

## 17 **Abstract**

18 Psittaciformes (parrots, cockatoos and lorikeets) comprise one of the most colourful clades of birds. Their  
19 unique pigments and cavity nesting habits are two potential explanations for their colourful character.  
20 However, plumage colour varies substantially between parrot species and sometimes also between males  
21 and females of the same species. Here, we use comparative analyses to evaluate what factors correlate  
22 with colour elaboration, colour diversity and sexual dichromatism. Specifically, we test the association  
23 between different aspects of parrot colouration and (1) the intensity of sexual selection and social  
24 interactions, (2) variation along the slow-fast life-history continuum and (3) climatic variation. We show  
25 that larger species and species that live in warm environments display more elaborated colours, yet  
26 smaller species have higher levels of sexual dichromatism. Larger parrots tend to have darker and more  
27 blue and red colours. Parrots that live in humid environments are darker and redder, whilst species  
28 inhabiting warm regions have more blue plumage colours. In general, the variables we considered explain  
29 small to moderate amounts of variation in parrot colouration (up to 20%). Our data suggest that sexual  
30 selection may be acting more strongly on males in small, short-lived parrots leading to sexual  
31 dichromatism. More elaborate colouration in both males and females of the larger, long-lived species with  
32 slow tropical life-histories suggests that mutual mate choice and reduced selection for crypsis may be  
33 important in these species, as has been shown for passerines.

34 *Keywords:* plumage colour elaboration, sexual dichromatism, body size, climate, psittaciformes,  
35 comparative analyses.

36

37

38

## 39 **Introduction**

40 Birds show great diversity in plumage colour and many studies have aimed to explain the proximate and  
41 ultimate mechanisms behind this diversity (Baker & Parker, 1979; Dale, Dey, Delhey, Kempnaers, &  
42 Valcu, 2015; Delhey, 2017, 2018; Hill & McGraw, 2006; Miller, Leighton, Freeman, Lees, & Ligon,  
43 2019; Taysom, Stuart-Fox, & Cardoso, 2011). Among birds, Psittaciformes – parrots, cockatoos and  
44 lorikeets (from now on collectively called parrots) – show some of the most striking plumage colouration  
45 (Berg & Bennett, 2010; Delhey, 2015). However, the evolutionary forces underlying their colourful  
46 character remain poorly understood (Berg & Bennett, 2010). It has been argued that parrots are colourful  
47 because they can synthesise and deposit red and yellow psittacofulvin pigments in their feathers, which  
48 are unique to parrots (McGraw & Nogare, 2004; Stradi, Pini, & Celentano, 2001). Because these  
49 pigments are synthesised endogenously, parrots might be able to deposit higher concentrations and  
50 display more intense colours compared with other bird species that can only obtain carotenoids (to  
51 produce yellow to red colours) through their diet (Delhey, 2015). Psittacofulvins, in combination with  
52 melanin pigments and feather microstructural components (which produce structural colours such as  
53 blue), enable parrots to display colours that encompass a large proportion of the entire avian colour gamut  
54 (Berg & Bennett, 2010; Delhey, 2015). In addition, most parrots breed in cavities, which are safe nesting  
55 sites that provide protection to parents and offspring from predators (Martin & Pingjun Li, 1992),  
56 potentially removing the need to be cryptic at the nest. Parrots, both males and females, are indeed more  
57 colourful than expected for their species richness (Delhey, 2015) and many species are mutually  
58 ornamented (Berg & Bennett, 2010).

59 Parrots are generally colourful, but also show great colour variation among species. For example,  
60 some cockatoo species are monochromatic and entirely white, whilst the Eclectus parrot (*Eclectus*  
61 *roratus*) is highly sexually dichromatic, with males being mainly green and females bright red and blue.  
62 The selective forces behind this substantial variation in colour elaboration and sexual dichromatism

63 within parrots (Delhey, 2015; Delhey & Peters, 2017; Taysom *et al.*, 2011) are not yet well understood  
64 (Berg & Bennett, 2010).

65 Ornamental traits might be used in competitive interactions or in sexual displays. For this reason,  
66 many studies have explored how sexual and social interactions may have driven plumage colour evolution  
67 (Dale *et al.*, 2015; Dunn, Whittingham, & Pitcher, 2001; Miller *et al.*, 2019; Møller & Birkhead, 1994;  
68 Owens & Hartley, 1998; Rubenstein & Lovette, 2009). Colour traits can be favoured by sexual selection  
69 if the expression of the trait increases the reproductive success of individuals by gaining more access to  
70 mates, or by social selection if their expression is critical in the competition for social status or access to  
71 resources such as food or territories (West-Eberhard, 1983).

72 The intensity of sexual selection, as found in polygynous species, correlates with the occurrence  
73 of multiple ornaments (Møller & Pomiankowski, 1993) and sexual dichromatism in birds (Dale *et al.*,  
74 2015; Dunn *et al.*, 2001). In lizards, two proxies for sexual selection intensity (sexual dimorphism in size  
75 and colour) correlate positively with colour diversity, i.e. the different colours and patterns an individual  
76 displays (Chen, Stuart-Fox, Hugall, & Symonds, 2012). Additionally, bird species with high levels of  
77 extra-pair paternity presumably experience stronger sexual selection and also show higher levels of sexual  
78 dichromatism (Møller & Birkhead, 1994; Owens & Hartley, 1998). A large-scale comparative analysis in  
79 passerines showed that sexual selection is the strongest predictor of sexual dichromatism (Dale *et al.*,  
80 2015).

81 Colour ornamentation may have also evolved in response to the selective pressures of complex  
82 social interactions (Heinsohn, Legge, & Endler, 2005; Santana, Alfaro, Noonan, & Alfaro, 2013). For  
83 group living species, such as parrots, it might be advantageous to effectively signal status, age or identity  
84 (Bridge, Hylton, Eaton, Gamble, & Schoech, 2008; Dale *et al.*, 2015), which may be easier to achieve  
85 with multiple signals (e.g. with higher colour diversity). Support for this idea comes from primates, where  
86 the complexity of facial markings is correlated with gregariousness (Santana *et al.*, 2013). Further support  
87 comes from a study on the Eclectus parrot, showing that the extreme scarcity of suitable nest cavities (~1  
88 per square kilometre) has intensified intrasexual competition (Heinsohn *et al.*, 2005). Females spent most

89 of their time protecting their nest (for around 11 months a year) and they may kill each other in disputes  
90 over tree hollows (Heinsohn *et al.*, 2005). Thus, Heinsohn *et al.* (2005) suggested that the expression of  
91 conspicuous colours in females is a consequence of the need to display cavity ownership.

92 With a few exceptions, the mating system of parrots is social monogamy (Toft & Wright, 2015),  
93 which implies lower levels of sexual selection. However, a recent study showed considerable variation in  
94 sperm length in parrots, with sexually dichromatic and gregarious species having longer sperm (Carballo  
95 *et al.*, 2019). This suggests that some parrots experience higher levels of sperm competition, for example  
96 due to increased opportunities for extra-pair mating when pairs nest in close proximity (Møller &  
97 Birkhead, 1993). We can thus ask whether variation in sexual dichromatism, colour elaboration and  
98 colour diversity are linked to indicators of the intensity of sexual selection in parrots.

99 The intensity of sexual selection may also depend on the species' life-history strategy  
100 (Winemiller, 1992). Given that the lifespan of parrots ranges from 8.5 to 100 years (Wasser & Sherman,  
101 2010), one can explore whether the slow-fast life-history continuum is linked to parrot plumage  
102 colouration. In general, parrots form long-lasting pair bonds and the formation of such bonds may take  
103 time (Toft & Wright, 2015). Smaller parrot species experience a higher turnover of mates (Toft & Wright,  
104 2015), which might be related to the higher mortality rate associated with smaller body size (de  
105 Magalhaes, Costa, & Church, 2007; Wasser & Sherman, 2010). Consequently, the expression of sexually  
106 selected traits that help speed up the selection of mates could be more beneficial for females in species  
107 with lower adult survival if it reduces the time needed to identify a suitable male and form a pair bond.  
108 On the other hand, long-lived species with long-lasting pair bonds might experience mutual mate choice,  
109 linked to higher parental investment in both sexes (Kokko & Johnstone, 2002). In such cases, both males  
110 and females are expected to be more elaborately coloured. Larger species also experience reduced  
111 predation risk, a factor that may explain why males and females of larger passerine species have more  
112 elaborated colours (Dale *et al.*, 2015). Furthermore, the slow-fast life-history continuum is related to  
113 extra-pair paternity: species with higher adult mortality rates and larger clutch sizes have higher levels of  
114 extra-pair paternity (Arnold & Owens, 2002).

115 Different studies have evaluated how abiotic factors affect bird plumage colour evolution and a  
116 variety of hypotheses have been proposed to explain colour variation both within and across avian taxa  
117 (Dale *et al.*, 2015; Miller *et al.*, 2019; Ribot, Berg, Schubert, Endler, & Bennett, 2019). Previous studies  
118 showed that achromatic (light-to-dark) variation in birds is related to climate variables such as  
119 temperature and precipitation (Delhey, 2017, 2018, 2019; Heidrich *et al.*, 2018; Miller *et al.*, 2019;  
120 Pinkert, Brandl, & Zeuss, 2017; Ribot *et al.*, 2019). Specifically, a negative relationship between melanin  
121 pigmentation and temperature has been reported in several taxa (Delhey, 2018; Heidrich *et al.*, 2018;  
122 Pinkert *et al.*, 2017), in support of the thermal melanism hypothesis (Clusella Trullas, van Wyk, &  
123 Spotila, 2007). This eco-geographical rule proposes that darker animals inhabit colder environments,  
124 presumably for thermoregulation reasons (Clusella Trullas *et al.*, 2007; Delhey, 2018). Similarly,  
125 Gloger's rule suggests a positive association between melanin pigmentation and precipitation (Delhey,  
126 2017, 2019; Gloger, 1833), but the adaptive function of the link between darker colours and precipitation  
127 is not yet clear (Burt & Ichida, 2004a; Delhey, 2017; Zink & Remsen, 1986).

128 In summary, different factors may affect plumage colouration and sexual dichromatism.  
129 Therefore, to better understand what factors might explain interspecific variation in colour elaboration,  
130 colour diversity and sexual dichromatism, it is important to consider multiple variables simultaneously.  
131 So far, few studies on plumage colouration have considered multiple variables. Dale *et al.* (2015) used  
132 comparative analyses to explore the effects of multiple traits on plumage colour in passerines.  
133 Specifically, this study suggests that the evolution of plumage colour and sexual dichromatism are mainly  
134 driven by sexual selection and life-history traits, with stronger effects on female than on male colour.  
135 Both males and females are more colourful in larger species and in species with tropical life histories (i.e.  
136 small clutch size, low seasonality habitats), whilst sexual dichromatism was higher in smaller species and  
137 in species with male-biased sexual selection.

138 Here, we ask what factors affect plumage colouration in parrots. We quantified achromatic and  
139 chromatic colour variation among all 398 species of the order Psittaciformes based on colour plates, and  
140 computed estimates of colour elaboration, colour diversity and sexual dichromatism. Our study had three

141 main aims. (1) To test whether indicators of the intensity of sexual selection and social interactions relate  
142 to variation in plumage colouration in parrots. We predict higher sexual dichromatism, and higher colour  
143 elaboration and colour diversity in males in species that (a) show stronger male-biased sexual size  
144 dimorphism and (b) breed at higher densities (i.e. are gregarious). (2) To test whether the slow-fast life-  
145 history continuum is associated with plumage colour variation in parrots. We predict higher sexual  
146 dichromatism, and higher colour elaboration and colour diversity in males in species that (a) have smaller  
147 body size (because body size correlates positively with longevity; Wasser & Sherman, 2010) and (b) lay  
148 larger clutches. We predict lower sexual dichromatism but higher colour elaboration and colour diversity  
149 in both males and females (mutual ornamentation) in species that (c) have large body size and (d) lay  
150 smaller clutches. (3) To test whether parrots follow Gloger's rule and the thermal melanism hypothesis. If  
151 so, we predict that (a) darker species inhabit more humid and colder environments and (b) darker species  
152 inhabit densely forested rather than open habitat types (because the former are typically more humid).

## 153 **Material and methods**

### 154 **Plumage colour scores**

155 We compiled digital images of colour plates of both sexes for each of the 398 extant parrot species  
156 illustrated in the *Handbook of the Birds of the World Alive* (HBW Alive, del Hoyo *et al.*, 2017). We  
157 imported the images into *Adobe Photoshop* (Adobe Inc. San Jose, CA), cropped them to remove the  
158 background colour and all bare parts of the birds, thus keeping only the body regions covered by  
159 plumage, and saved them as PNG files. Subsequently, we delineated 12 body patches (nape, crown,  
160 forehead, throat, upper breast, lower breast, shoulder, secondary coverts, primary coverts, secondaries,  
161 primaries and tail) for each sex and extracted RGB (red, green, blue) colour values from 400 randomly  
162 chosen pixels in each patch using the R package "colorZapper" v.1.4.4 (Valcu & Dale, 2014). Even  
163 though the different body patches differed in size, we randomly selected 400 pixels from each patch,  
164 because body regions may vary in signalling importance. For the monochromatic species (i.e. when one

165 plate is shown to represent both male and female), the colour values were randomly extracted twice (once  
166 for the male and once for the female). In some cases, the plates of one of the sexes did not show the entire  
167 body, hence the colour values of the missing body patches were extracted from the plate of the other sex.  
168 When multiple subspecies were illustrated, the nominate species was scored. Finally, we calculated mean  
169 R, G and B values for each patch, sex and species. We transformed these mean values to CIELAB  
170 coordinates (Tkalčič & Tasič, 2003) using the R package “colorspace” v.1.4-1 (Zeileis *et al.*, 2019). There  
171 are three CIELAB coordinates: (1) *L*, colour lightness, represents the achromatic channel (black = 0,  
172 white = 100, Figure 1a), (2) *a*, the chromatic channel between green (low values) and red (high values)  
173 (Figure 1b) and (3) *b*, the chromatic channel between blue (low values) and yellow (high values) (Figure  
174 1c). We used the CIELAB coordinates to compute the following colour variables:

- 175 a) *Colour elaboration score*, obtained by computing the Euclidean distance between each plumage  
176 patch and the centroid of the entire sample (joint average for *L*, *a*, and *b*). These values were  
177 averaged in each species, separately for males and females. Highly elaborate colours (in this case,  
178 red, blue and yellow) are those that differ more from the average colour (here: greenish brown)  
179 (Figure 1d). This index of colour elaboration yields a similar classification of elaborate colours as  
180 the one used in Dale *et al.* (2015) (compare Figure 1d with Figure S2 in Dale *et al.*, 2015).
- 181 b) Sexual differences in colouration, computed in two ways: (i) *Sexual dichromatism*, as the  
182 Euclidean distance in CIELAB space between homologous patches in males and females  
183 averaged across all patches for each species (Figure 2a), and (ii) *sexual difference in colour*  
184 *elaboration*, as the average difference in colour elaboration between males and females (Figure  
185 2b). The first index (i) estimates the absolute difference in colouration between males and  
186 females irrespective of whether males or females are more ornamented. The second one (ii)  
187 indicates whether it is males or females that have more elaborated colours. Note that if males and  
188 females have different colours but with the same level of elaboration (e.g. red and blue) this index  
189 will score low.



190 c) Three overall plumage colour scores for each sex and species by calculating average values for  $L$ ,  
191  $a$ , and  $b$  of all 12 body patches (Figure 1a-c, and see Figure S1 for more details of the raw colour  
192 distribution of each body patch). This allows us to assess whether explanatory variables favour  
193 the evolution of certain types of colours over others (e.g. red over green, light over dark). The  
194 downside of this approach is that species that harbour a wide range of colours may end up with  
195 intermediate average values of  $L$ ,  $a$  or  $b$ .

196 d) Finally, we estimated *colour diversity*, computed as the Euclidean distance between each plumage  
197 patch and the species-specific (rather than that of the entire sample as in (a)) centroid (joint  
198 average for  $L$ ,  $a$ , and  $b$  of all plumage patches of each species). This measure indicates whether a  
199 species has many different colours or is rather uniformly coloured.

200 The colour plates in the HBW have been painted to resemble real plumage colours as perceived  
201 by humans. To determine whether our estimates approximated those obtained using direct measurements  
202 of plumage, we used reflectance measurements obtained from 51 species of Australian parrots and  
203 cockatoos (Delhey, 2015; see Supplementary Information).

204 In general, all variables obtained from bookplates were positively correlated with estimates from  
205 reflectance spectra (all  $p < 0.001$ ). Colour elaboration scores showed the weakest correlations (males:  $r =$   
206  $0.53$ , females:  $r = 0.67$ ), followed by differences in colour elaboration between males and females ( $r =$   
207  $0.60$ ), colour diversity (males:  $r = 0.83$ , females:  $r = 0.74$ ) and sexual dichromatism ( $r = 0.86$ ).  $L$  scores  
208 (which depict light-to-dark variation) were also positively correlated (males:  $r = 0.88$ , females:  $r = 0.89$ ).  
209 It is harder to determine whether both chromatic coordinates in the CIELAB space, ( $a$  and  $b$ ) correlate  
210 with the chromatic coordinates obtained from visual models (xyz, see Supplementary Information)  
211 because the latter do not necessarily align with the former. However, if both types of chromatic  
212 coordinates represent similar colours then we would expect that a linear combination of visual model  
213 chromatic coordinates (xyz) should predict chromatic coordinates ( $a$ ,  $b$ ) from bookplates. This was the  
214 case: xyz predicted substantial variation in  $a$  (males,  $R^2 = 0.78$ ; effects(SE):  $x = -0.277(0.521)$ ,  $y = -$   
215  $2.406(0.246)$ ,  $z = 2.484(0.351)$ ; females,  $R^2 = 0.85$ ,  $x = -0.628(0.507)$ ,  $y = -3.123(0.258)$ ,  $z =$

216 3.044(0.333) and  $b$  (males,  $R^2 = 0.68$ , effects(SE):  $x = 2.931(0.831)$ ,  $y = 3.534(0.392)$ ,  $z = 1.114(0.558)$ ;  
217 females,  $R^2 = 0.74$ ,  $x = 3.257(0.898)$ ,  $y = 4.654(0.457)$ ,  $z = 0.031(0.588)$ ). Thus, results obtained from  
218 bookplates should provide a reasonable approximation to colour variation measured on the plumage, as  
219 shown in other studies (Bergeron & Fuller, 2018; Dale *et al.*, 2015).

## 220 **Measures of sexual selection and gregariousness**

221 As a measure of the intensity of sexual selection, we calculated sexual size dimorphism (SSD) as  $PCI_{male}$   
222  $body\ size - PCI_{female\ body\ size}$  (see below). We scored gregariousness as a categorical variable (“yes” or “no”)  
223 according to information from the “breeding” section of the HBW Alive (del Hoyo *et al.*, 2017). A  
224 species was classified as gregarious if the description suggested that the breeding pairs nest close together  
225 or if the species is described as colonial.

## 226 **Life-history traits**

227 For each species, we estimated body size of males and females as the first principal component (PC1)  
228 from a PCA that included three body measurements: wing, tarsus and tail length. PC1 explained 65% of  
229 the variation in the data. We measured these traits for an average of 3.3 (*range*: 1-22) females and 3.6  
230 (*range*: 1-23) males per species ( $N_{species} = 214$ ) from individuals held at the Loro Parque Fundación (LPF),  
231 Tenerife, Spain. Species body size was estimated by calculating the average of male and female body  
232 size. For the species that were not present in the LPF collection, we compiled body measurements from  
233 the book *Parrots of the World* (Forshaw, 1978).

234 We obtained clutch size for each species from the HBW Alive (del Hoyo *et al.*, 2017). As some  
235 species did not have clutch size data, we completed the database using LPF records from the 2012-2015  
236 breeding seasons, by calculating the mean clutch size from 1-105 clutches per species (*mean* = 10.5), and  
237 using data available in the book *Parrots of the World* (Forshaw, 1978), and in the websites  
238 [www.parrots.org](http://www.parrots.org) and [www.avianweb.com](http://www.avianweb.com). The source of the body measurements and clutch size data for  
239 each species is given in the online repository.

## 240 **Environmental variables**

241 We considered three environmental variables: habitat type, mean annual temperature (°C) and mean  
242 annual precipitation (mm). We scored habitat type as a categorical variable (1 = “open”, 2 = “mixed”, 3 =  
243 “forested”) using the description in the “habitat” section of the HBW Alive (del Hoyo *et al.*, 2017).  
244 Following McNaught & Owens (2002), we classified habitat type as “open” for species that occur in  
245 habitats such as savannah, grassland, shrubland, forest edges, arid and eucalypt woodland or cliffs, as  
246 “forested” for species that occur in habitats such as forest, riverine forest, riparian forest, pine woodland,  
247 mangrove, evergreen lowland or wooded country, and as “mixed” for species that inhabit both “open” and  
248 “forested” habitat.

249 To estimate species-specific mean annual temperature and mean annual precipitation, we first  
250 obtained the extant breeding ranges for each parrot species using the database from BirdLife  
251 International’s species distribution maps (BirdLife International, 2018). We only considered the natural  
252 distribution of each species and hence removed any breeding ranges where they were introduced. We  
253 extracted the mean annual temperature and mean annual precipitation corresponding to the breeding  
254 ranges of each species using the high-spatial resolution CHELSA climate data (Karger *et al.*, 2017a,  
255 2017b). Breeding ranges and environmental rasters were re-projected to an equal-area (Mollweide)  
256 projection. Spatial analyses were performed with the R package “rangeMapper” v.0.3-7 (Valcu, Dale, &  
257 Kempnaers, 2012).

## 258 **Phylogeny**

259 We extracted a sample of 1000 phylogenetic trees (the “Hackett” backbone, Hackett *et al.*, 2008) for 351  
260 parrot species from phylogenetic tree distributions available on *birdtree.org* (Jetz, Thomas, Joy,  
261 Hartmann, & Mooers, 2012; Jetz *et al.*, 2014). We added the 47 Psittaciformes species missing in these  
262 phylogenies using the function *add.species.to.genus* in the R package “phytools” v.0.6-99 (Revell, 2012).  
263 This function finds the branch of the phylogenetic tree common to the corresponding genus and adds the

264 missing taxon at a random position within this branch. A consensus tree was constructed with minimum  
265 clade frequency threshold of 0.5 (Rubolini, Liker, Garamszegi, Møller, & Saino, 2015) using the function  
266 *SumTrees* from the package “DendroPy” v.4.4.0 (Sukumaran & Holder, 2010).

## 267 **Statistical analysis**

268 All statistical and spatial analyses were performed in R 3.6.2 (R Development Core Team, 2019). The  
269 variables sexual dichromatism and sexual difference in colour elaboration were  $\log_{10}$  transformed and  
270  $\log_{10}$ -modulus transformed ( $\text{sign}(x) \cdot \log_{10}(\text{abs}(x)+1)$ , John & Draper, 1980), respectively, for analyses. All  
271 variables were standardised by centring and dividing by one standard deviation.

272 To explore the effect of abiotic and biotic factors on plumage colour elaboration, sexual  
273 dichromatism and colour diversity across parrots, we used species-level phylogenetic linear models.  
274 These models were fitted with the R package “phylolm” v.2.6 (Ho & Ané, 2014) using the Pagel’s  $\lambda$   
275 model (Pagel, 1999), which measures the strength of the phylogenetic signal. We ran separate models for  
276 our seven response variables, i.e. colour elaboration, sexual dichromatism, sexual difference in colour  
277 elaboration, colour diversity and the three plumage colour scores ( $L$ ,  $a$  and  $b$ ), and we considered body  
278 size ( $N = 357$ ), clutch size ( $N = 290$ ), habitat type ( $N = 398$ ), mean annual temperature ( $N = 398$ ), mean  
279 annual precipitation ( $N = 398$ ), sexual size dimorphism ( $N = 357$ ) and gregariousness ( $N = 350$ ) as  
280 predictors in our analyses. First, we ran univariate models to explore the effect of each predictor  
281 separately, and allowing the use of the full dataset. For the 273 species for which all the predictors were  
282 available, we then ran a multiple predictor model to explore the effect of each predictor, whilst controlling  
283 for the others.

284 We estimated the proportion of variance explained by the phylogenetic linear models following  
285 Ives (2019) by using the function *R2.resid* in the R package “rr2” v.1.0.2 (Ives & Li, 2018). We  
286 calculated two  $R^2$  coefficients: (1)  $R^2_{full}$ : the total variance explained by the full model (both by  
287 phylogeny and fixed effects), and (2)  $R^2_{fixef}$ : the variance explained by the fixed effects only.

288 We ran species-level phylogenetic linear models for each of the 1000 phylogenies and we  
289 averaged the model coefficients. Additionally, we computed an inference interval as the 2.5<sup>th</sup> - 97.5<sup>th</sup>  
290 percentiles for p-values, Pagel's  $\lambda$  and the two  $R^2$  coefficients. Therefore, the Pagel's  $\lambda$  and the  $R^2$   
291 coefficients inference intervals contain both the error of the distribution underlining the phylogenetic trees  
292 and the uncertainty of the taxonomy-based data imputation.

## 293 **Results**

### 294 *Effects on plumage colouration*

295 Both males and females of larger species and of species with smaller clutch size had more elaborated  
296 plumage colours. These effects were statistically significant in the single and multiple predictor models  
297 for body size (Figure 3, Table S1-S4), but the clutch size effect was statistically significant only in the  
298 single predictor models (Figure 3a). The lower effects and loss of significance of clutch size in the  
299 multiple predictor model (Figure 3b) might be due the intercorrelation between clutch size and body size  
300 (Figure S2). We also found that annual mean temperature had a positive effect on colour elaboration in  
301 both males and females; this effect was significant in the single and multiple predictor models (Figure 3,  
302 Table S1-S4).

303 In both sexes, body size was significantly negatively associated with  $L$  and  $b$  scores and  
304 positively associated with  $a$  scores, both in the single predictor models (Figure 4a, Table S5 and S6) and  
305 in the multiple predictor model (Figure 4b, Table S7 and S8). These results suggest that males and  
306 females of larger species are darker, redder and more blue-coloured.

307 In both sexes, precipitation had a negative effect on  $L$  scores and a positive effect on  $a$  scores,  
308 whilst temperature had a negative effect on  $b$  scores in the single (Figure 4a, Table S5 and S6) and  
309 multiple predictor models (Figure 4b, Table S7 and S8). These results indicate that species that are darker  
310 and redder inhabit areas of higher mean annual precipitation, and that more blue-coloured species inhabit  
311 areas of higher mean annual temperature.

312 Habitat type did not have an effect on plumage colour in parrots (Figure 3 and 4, Table S1-S8), at  
313 least based on the data and classification used in this study.

#### 314 *Effects on colour diversity*

315 None of the predictors used in this study had a statistically significant effect on colour diversity in  
316 parrots, either in the single or in the multiple predictor models (Figure 5, Table S9-S12).

#### 317 *Effects on sexual differences in colouration*

318 The single predictor models showed that body size is negatively related to sexual dichromatism  
319 (Figure 6a, Table S13). Additionally, sexual dichromatism was more pronounced in more closed or  
320 forested habitats (Figure 6a, Table S13). In the multiple predictor models, the only effect that remained  
321 significant is that of body size on sexual dichromatism (Figure 6c, Table S15). The effect of habitat type  
322 on sexual dichromatism (Figure 6c, Table S15) was somewhat smaller and no longer significant, possibly  
323 due to reduced statistical power related to lower sample size (from  $N = 357$  to  $N = 273$ ). We found no  
324 effect of any of the predictors on the sexual difference in colour elaboration (Figure 6b and d, Table S14  
325 and S16).

#### 326 *Variance explained by phylogeny*

327 In all models,  $R^2_{full}$  (variance explained by both phylogeny and fixed effects) was much higher  
328 (*range*: 0.274 – 0.669) than  $R^2_{fixef}$  (variance explained only by the fixed effects, *range*:  $-1.57 \times 10^{-4}$  – 0.21).  
329 This indicates that the phylogenetic signal in the residuals explains most of the variance in the models  
330 (see Table S1-S16).

## 331 **Discussion**

332 Our study shows that variation in plumage colouration across all species of parrots, whilst strongly  
333 phylogenetically conserved, can be partly explained by key life-history traits and environmental variables.  
334 Among the former, body size seems the most important: larger species display more elaborate colours,

335 such as red or blue, whilst smaller species had less elaborate plumage yet higher levels of sexual  
336 dichromatism (Figure 7 and Figure S3). Environmental effects were largely restricted to climatic variables  
337 and were partially in agreement with ecogeographical rules of colour variation. Two climatic variables  
338 correlate with plumage colour variation in parrots: temperature and precipitation.

339         Darker parrots are more frequent in humid environments, as predicted by Gloger's rule (Rensch,  
340 1936). Support for Gloger's rule has already been found at the intraspecific level in parrots (in the  
341 crimson rosella *Platycercus elegans*; Ribot *et al.*, 2019). We now show that it is a general pattern that  
342 applies at the interspecific level based on all 398 extant parrot species. There are two plausibly  
343 explanations for the correlation between humidity and darker colours (Delhey, 2017). First, darker colours  
344 would be favoured for camouflage in more humid environments as these harbour more vegetation and  
345 low light conditions. Second, as the presence of feather-degrading bacteria is higher in more humid  
346 environments, darker animals (with higher melanin concentration in their feathers) would be more  
347 resistant to feather degradation. Melanin deposition thickens the cortex of the barb and this makes  
348 feathers more resistant to feather-degrading bacteria (Bonser, 1995), which is more important in humid  
349 and warmer environments (Burt & Ichida, 1999, 2004b).

350         Our results also show that males and females have more elaborated colours in warmer  
351 environments. As variation in temperature closely follows variation in latitude, this means that tropical  
352 parrots tend to be more colourful. Whether tropical birds are more colourful than their temperate  
353 counterparts has been a contested issue for nearly 200 years. Gloger, for example, suggested that tropical  
354 birds should be more pigmented and colourful because the environment was more benign allowing the  
355 production of such colours (Gloger, 1833). Proper tests of latitudinal patterns of colouration in birds have  
356 yielded conflicting results, some studies reporting no such correlation or even the opposite pattern  
357 (Bailey, 1978; Dalrymple *et al.*, 2015), and others confirming the more elaborate colours of tropical  
358 species (Dale *et al.*, 2015; Willson & von Neumann, 1972). Our findings agree with the latter, and are  
359 consistent with two non-mutually exclusive hypotheses (Dale *et al.*, 2015). First, that tropical species are  
360 more colourful because mutual mate choice is stronger in those species; and second, because resource

361 competition is stronger in the tropics, colour ornamentation might signal status in aggressive contexts.  
362 These effects are thought to be mediated by selection pressures associated with slow life histories typical  
363 of large species living in tropical environments.

364 We found that larger species display on average more elaborated colours, and also show darker,  
365 redder and more blue colours in their plumage. A similar finding has been reported in a large-scale  
366 comparative analysis of passerine plumage colour (Dale *et al.*, 2015). Together, our results and those in  
367 Dale *et al.* (2015) disagree with the hypothesis that body size represents an evolutionary constraint on  
368 plumage colouration, as suggested by Galván *et al.* (2013). Firstly, Galván *et al.* (2013) suggested that  
369 larger species might be less colourful compared to smaller species because, proportionally to their size,  
370 the latter consume higher quantities of food (Tella *et al.*, 2004). Hence, smaller species would have higher  
371 concentrations of limiting carotenoids pigments in their blood to colour their feathers. This explanation  
372 does not apply to parrots, since they do not deposit carotenoids in their plumage (Berg & Bennett, 2010).  
373 Secondly, they suggested that larger species might be able to detect other individuals at longer distances,  
374 whereas smaller species might have been forced to develop more conspicuous signals to communicate  
375 with conspecifics. Our results, on the contrary, are more consistent with the hypothesis that larger species  
376 experience lower predation pressure (Ricklefs, 2010), hence reducing selection for crypsis.

377 Our analyses further indicate that smaller parrot species –while displaying on average less  
378 elaborate colours– are more sexually dichromatic, in most cases (but not all) due to males having more  
379 elaborated colours than females (Figure S3). This suggests that smaller parrots are not only constrained  
380 from having highly elaborate colours, but also that the cost-benefit ratio of ornamental plumage colours  
381 varies between the sexes. Smaller species tend to have shorter lifespans (Bennett & Owens, 2002; de  
382 Magalhaes *et al.*, 2007; Wasser & Sherman, 2010), which reduces the probability that a pair breeds  
383 together in subsequent seasons (Mauck, Marschall, & Parker, 1999). Under this scenario, higher levels of  
384 extra-pair paternity may be tolerated, i.e. it might not lead to reduced male investment, because males  
385 might invest more in current rather than in uncertain future reproduction (Mauck *et al.*, 1999; Arnold &  
386 Owens, 2002). Previous studies showed that the frequency of extra-pair paternity is related to sexual



387 dichromatism in birds (Møller & Birkhead, 1994; Owens & Hartley, 1998) and that dichromatic parrot  
388 species have longer sperm, and hence potentially higher levels of extra-pair paternity (Carballo *et al.*,  
389 2019). Thus, our finding that smaller parrot species are more dichromatic (with a tendency of males  
390 having more elaborated colours than females, Figure S3) may be a consequence of sexual selection via  
391 female choice for (extra-pair) mates. Sexual selection could also explain the observed relationship  
392 between habitat type and sexual dichromatism. Species inhabiting more forested habitats are more  
393 dichromatic possibly because bright colours would be favoured to help maximising conspicuousness of  
394 the sex under stronger sexual selection (Marchetti, 1993).

395         Many parrots form long-lasting pair bonds (Toft & Wright, 2015). Thus, larger species with  
396 longer lifespans (de Magalhaes *et al.*, 2007; Wasser & Sherman, 2010) might be less dichromatic but  
397 display more elaborated colours as a consequence of mutual mate choice. As parrots are generally long-  
398 lived, especially compared with other bird species (Wasser & Sherman, 2010), we expect that both sexes  
399 are typically equally ornamented due to mutual mate choice, as observed in other tropical species (Bailey,  
400 1978; Dale *et al.*, 2015). The greater level of ornamentation parrots display (Delhey, 2015) might be due  
401 to mutual mate choice or the lack of selection on cryptic plumage in females that nest in cavities, at least  
402 in larger species. Moreover, the fact that suitable cavities are often a scarce resource may lead to strong  
403 competition between females (Heinsohn, Legge and Endler, 2005) for access to these resources and  
404 elaborate colouration may be selected as a signal of competitive ability or to advertise territory ownership.

405         In conclusion, our results are consistent with the idea that life-history traits reflecting predation  
406 pressure, the abiotic environment and possibly sexual selection have all shaped the evolution of plumage  
407 colouration in parrots. Body size had a consistent effect, indicating that this life-history trait plays a key  
408 role in the variation of colour elaboration and sexual dichromatism in parrots. Phylogenetic analyses  
409 indicated that an important component of the variation in parrot colouration and in sexual dichromatism  
410 was established in ancient evolutionary history, supporting results from comparative analyses in other  
411 birds (Brouwer & Griffith, 2019; Griffith, Owens, & Thuman, 2002). However, even though phylogeny  
412 explained most of the variation, we still found significant effects of life-history and environment on

413 plumage colouration and sexual differences in parrots. Our comparative study leads to several testable  
414 hypotheses. First, we propose that larger species are more ornamented because of reduced selection  
415 against displaying colourful plumage given lower predation risk. Second, our results suggest that smaller  
416 species might experience more intense sexual selection on males, possibly via extra-pair paternity, whilst  
417 mutual mate choice might be common in larger species.

## 418 **Data Accessibility**

419 All data, scripts and supplementary information accompanies this paper at <https://osf.io/2xr4v/>

## 420 **Acknowledgments**

421 We thank Loro Parque, Loro Parque Fundación (LPF) and their respective presidents, Wolfgang and  
422 Christoph Kiessling, for the collaboration, the staff of LPF for support, Auguste M. P. von Bayern for  
423 developing the collaboration between the LPF and the Max Planck Institute for Ornithology, Pau  
424 Puigcerver and Rafael Zamora for support during data collection, and Laurie O’Neill for comments on  
425 manuscript drafts. Illustrations in figures were reproduced by permission of Lynx Edicions.

## 426 **Competing interests**

427 The authors report no conflict of interest.

## 428 **Author Contributions**

429 Conceived the study: L.C., M.V. and B.K. Collected the data: L.C. Analysed the data: L.C., M.V. and  
430 K.D. with input from B.K. Wrote the paper: L.C. with help of B.K and K.D. and input from M.V. L.C. is  
431 a member of the International Max Planck Research School (IMPRS) for Organismal Biology. This work  
432 was funded by the Max Planck Society (to B.K.).

## References

- Arnold, K. E., & Owens, I. P. F. (2002). Extra-pair paternity and egg dumping in birds: life history, parental care and the risk of retaliation. *Proceedings of the Royal Society B: Biological Sciences*, 269(1497), 1263–1269. <https://doi.org/10.1098/rspb.2002.2013>
- Bailey, S. F. (1978). Latitudinal Gradients in Colors and Patterns of Passerine Birds. *The Condor*, 80(4), 372–381. <https://doi.org/10.2307/1367187>
- Baker, R. R., & Parker, G. A. (1979). The Evolution of Bird Coloration. *Philosophical Transactions of the Royal Society B: Biological Sciences*, 287(1018), 63–130. <https://doi.org/10.1098/rstb.1979.0053>
- Bennett, P. M., & Owens, I. P. F. (2002). *Evolutionary Ecology of birds: Life histories, mating systems and extinction. Oxford series in ecology and evolution.*
- Berg, M. L., & Bennett, A. T. D. (2010). The evolution of plumage colouration in parrots: A review. *Emu*, 110(1), 10–20. <https://doi.org/10.1071/MU09076>
- Bergeron, Z. T., & Fuller, R. C. (2018). Using Human Vision to Detect Variation in Avian Coloration: How Bad Is It? *The American Naturalist*, 191(2), 269–276. <https://doi.org/10.1086/695282>
- Bonser, R. H. (1995). Melanin and the Abrasion Resistance of Feathers. *The Condor*, 97(2), 590–591. <https://doi.org/10.2307/1369048>
- Bridge, E. S., Hylton, J., Eaton, M. D., Gamble, L., & Schoech, S. J. (2008). Cryptic plumage signaling in Aphelocoma Scrub-Jays. *Journal of Ornithology*, 149(1), 123–130. <https://doi.org/10.1007/s10336-007-0253-y>
- Brouwer, L., & Griffith, S. C. (2019). Extra- pair paternity in birds. *Molecular Ecology*, 28(22), 4864–4882. <https://doi.org/10.1111/mec.15259>
- Burt, E. H., & Ichida, J. M. (1999). Occurrence of Feather-Degrading Bacilli in the Plumage of Birds. *The Auk*, 116(2), 364–372. <https://doi.org/10.2307/4089371>
- Burt, E. H., & Ichida, J. M. (2004a). Gloger's rule, feather-degrading bacteria, and color variation among

- song sparrows. *The Condor*, 106(3), 681–686. <https://doi.org/10.1650/7383>
- Burt, E. H., & Ichida, J. M. (2004b). Gloger's rule, feather-degrading bacteria, and color variation among song sparrows. *The Condor*, 106(3), 681. <https://doi.org/10.1650/7383>
- Burt, E. H., Schroeder, M. R., Smith, L. a, Sroka, J. E., & McGraw, K. J. (2010). Colourful parrot feathers resist bacterial degradation. *Biology Letters*, 7, 214–216. <https://doi.org/10.1098/rsbl.2010.0716>
- Carballo, L., Battistotti, A., Teltscher, K., Lierz, M., Bublat, A., Valcu, M., & Kempenaers, B. (2019). Sperm morphology and evidence for sperm competition among parrots. *Journal of Evolutionary Biology*, 32, 856–867. <https://doi.org/10.1111/jeb.13487>
- Chen, I.-P., Stuart-Fox, D., Hugall, A. F., & Symonds, M. R. E. (2012). Sexual selection and the evolution of complex color patterns in dragon lizards. *Evolution*, 66(11), 3605–3614. <https://doi.org/10.1111/j.1558-5646.2012.01698.x>
- Clusella Trullas, S., van Wyk, J. H., & Spotila, J. R. (2007, July 1). Thermal melanism in ectotherms. *Journal of Thermal Biology*. Pergamon. <https://doi.org/10.1016/j.jtherbio.2007.01.013>
- Dale, J., Dey, C. J., Delhey, K., Kempenaers, B., & Valcu, M. (2015). The effects of life-history and social selection on male and female plumage coloration. *Nature*, 527(7578), 367–370. <https://doi.org/10.1038/nature15509>
- Dalrymple, R. L., Kemp, D. J., Flores-Moreno, H., Laffan, S. W., White, T. E., Hemmings, F. A., ... Moles, A. T. (2015). Birds, butterflies and flowers in the tropics are not more colourful than those at higher latitudes. *Global Ecology and Biogeography*, 24(12), 1424–1432. <https://doi.org/10.1111/geb.12368>
- de Magalhaes, J. P., Costa, J., & Church, G. M. (2007). An Analysis of the Relationship Between Metabolism, Developmental Schedules, and Longevity Using Phylogenetic Independent Contrasts. *The Journals of Gerontology: Biological Sciences*, 62A(2), 149–160. <https://doi.org/10.1093/gerona/62.2.149>
- del Hoyo, J., Elliott, A., & Christie, D. A. (2017). *Handbook of the birds of the world*. Lynx Edicions.

- Delhey, K. (2015). The colour of an avifauna : A quantitative analysis of the colour of Australian birds. *Scientific Reports*, 1–12. <https://doi.org/10.1038/srep18514>
- Delhey, K. (2017). Gloger’s rule. *Current Biology*, 27, R689–R691. <https://doi.org/10.1101/cshperspect.a016774>
- Delhey, K. (2018). Darker where cold and wet: Australian birds follow their own version of Gloger’s rule. *Ecography*, 41(4), 673–683. <https://doi.org/10.1111/ecog.03040>
- Delhey, K. (2019). A review of Gloger’s rule, an ecogeographical rule of colour: definitions, interpretations and evidence. *Biological Reviews*, 94(4), 1294–1316. <https://doi.org/10.1111/brv.12503>
- Delhey, K., & Peters, A. (2017). The effect of colour-producing mechanisms on plumage sexual dichromatism in passerines and parrots. *Functional Ecology*, 31(4), 903–914. <https://doi.org/10.1111/1365-2435.12796>
- Dunn, P., Whittingham, L., & Pitcher, T. (2001). Mating systems, sperm competition, and the evolution of sexual dimorphism in birds. *Evolution*, 55(1), 161–175. [https://doi.org/10.1554/0014-3820\(2001\)055\[0161:MSSCAT\]2.0.CO;2](https://doi.org/10.1554/0014-3820(2001)055[0161:MSSCAT]2.0.CO;2)
- Edwards, D. B. (2012). Immune Investment Is Explained by Sexual Selection and Pace-of-Life, but Not Longevity in Parrots (Psittaciformes). *PLoS ONE*, 7(12). <https://doi.org/10.1371/journal.pone.0053066>
- Forshaw, J. M. (1978). *Parrots of the world* (Second Edi). Melbourne, Australia: Lansdowne Editions.
- Galván, I., Juan J. Negro, Rodríguez, A., & Carrascal, L. M. (2013). On showy dwarfs and sober giants: body size as a constraint for the evolution of bird plumage colouration. *Acta Ornithologica*, 48(1), 65–80. <https://doi.org/10.3161/000164513X670007>
- Gloger, C. W. L. (1833). *Das Abändern der Vogel durch Einfluss des Klimas*. August Schulz, Breslau.
- Grande, J. M., Negro, J. J., & Torres, M. J. (2004). The evolution of bird plumage colouration: A role for feather-degrading barcteria? *Ardeola*, 51(2), 375–383. Retrieved from <https://www.researchgate.net/publication/282507980>

- Griffith, S. C., Owens, I. P. F., & Thuman, K. A. (2002, October 9). Extra pair paternity in birds: A review of interspecific variation and adaptive function. *Molecular Ecology*. Wiley/Blackwell (10.1111). <https://doi.org/10.1046/j.1365-294X.2002.01613.x>
- Hackett, S. J., Kimball, R. T., Reddy, S., Bowie, R. C. K., Braun, E. L., Braun, M. J., ... Yuri, T. (2008). A phylogenomic study of birds reveals their evolutionary history. *Science*, 320(5884), 1763–1768. <https://doi.org/10.1126/science.1157704>
- Heidrich, L., Friess, N., Fiedler, K., Brändle, M., Hausmann, A., Brandl, R., & Zeuss, D. (2018). The dark side of Lepidoptera: Colour lightness of geometrid moths decreases with increasing latitude. *Global Ecology and Biogeography*, 27(4), 407–416. <https://doi.org/10.1111/geb.12703>
- Heinsohn, R., Legge, S., & Endler, J. A. (2005). Extreme Reversed Sexual Dichromatism in a Bird Without Sex Role Reversal. *Science*, 309(5734), 617–619. <https://doi.org/10.1126/science.1112774>
- Hill, G. E., & McGraw, K. J. (2006). *Bird Coloration: Function And Evolution*. Retrieved from [https://books.google.de/books?hl=en&lr=&id=BnM8musSTS4C&oi=fnd&pg=PP13&dq=Bird+Coloration&ots=05h8-P0TRd&sig=uoVdJ1URlp5BpGJZPkI8ebw0gj8&redir\\_esc=y#v=onepage&q=Bird+Coloration&f=false](https://books.google.de/books?hl=en&lr=&id=BnM8musSTS4C&oi=fnd&pg=PP13&dq=Bird+Coloration&ots=05h8-P0TRd&sig=uoVdJ1URlp5BpGJZPkI8ebw0gj8&redir_esc=y#v=onepage&q=Bird+Coloration&f=false)
- Ho, L. si T., & Ané, C. (2014). A linear-time algorithm for gaussian and non-gaussian trait evolution models. *Systematic Biology*, 63(3), 397–408. <https://doi.org/10.1093/sysbio/syu005>
- Hooper, P. L., & Miller, G. F. (2008). Mutual Mate Choice Can Drive Costly Signaling Even Under Perfect Monogamy. *Adaptive Behavior*, 16(1), 53–70. <https://doi.org/10.1177/1059712307087283>
- Ives, A., & Li, D. (2018). rr2: An R package to calculate R2s for regression models. *Journal of Open Source Software*, 3(30), 1028. <https://doi.org/10.21105/joss.01028>
- Jetz, W., Thomas, G. H., Joy, J. B., Hartmann, K., & Mooers, A. O. (2012). The global diversity of birds in space and time. *Nature*, 491(7424), 444–448. <https://doi.org/10.1038/nature11631>
- Jetz, Walter, Thomas, G. H., Joy, J. B., Redding, D. W., Hartmann, K., & Mooers, A. O. (2014). Global Distribution and Conservation of Evolutionary Distinctness in Birds. *Current Biology*, 24(9), 919–

930. <https://doi.org/10.1016/j.cub.2014.03.011>
- John, J. A., & Draper, N. R. (1980). An Alternative Family of Transformations. *Applied Statistics*, 29(2), 190. <https://doi.org/10.2307/2986305>
- Karger, D. N., Conrad, O., Böhner, J., Kawohl, T., Kreft, H., Soria-Auza, R. W., ... Kessler, M. (2017a). Climatologies at high resolution for the earth's land surface areas. *Scientific Data*, 4, 170122. <https://doi.org/10.1038/sdata.2017.122>
- Karger, D. N., Conrad, O., Böhner, J., Kawohl, T., Kreft, H., Soria-Auza, R. W., ... Kessler, M. (2017b). Data from: Climatologies at high resolution for the earth's land surface areas. Dryad Digital Repository.
- Kokko, H., & Johnstone, R. A. (2002). Why is mutual mate choice not the norm? Operational sex ratios, sex roles and the evolution of sexually dimorphic and monomorphic signalling. *Proceedings of the Royal Society B*, 357, 319–330. <https://doi.org/10.1098/rstb.2001.0926>
- Loiselle, B. A. (1988). Bird Abundance and Seasonality in a Costa Rican Lowland Forest Canopy. *The Condor*, 90(4), 761–772. <https://doi.org/10.2307/1368833>
- Martin, T. E., & Pingjun Li. (1992). Life history traits of open- vs. cavity-nesting birds. *Ecology*, 73(2), 579–592. <https://doi.org/10.2307/1940764>
- Masello, J. F., Lubjuhn, T., & Quillfeldt, P. (2008). Is the structural and psittacofulvin-based coloration of wild burrowing parrots *Cyanoliseus patagonus* condition dependent? *Journal of Avian Biology*, 39(6), 653–662. <https://doi.org/10.1111/j.1600-048X.2008.04417.x>
- Mauck, R. A., Marschall, E. A., & Parker, P. G. (1999). Adult Survival and Imperfect Assessment of Parentage: Effects on Male Parenting Decisions. *The American Naturalist*, 154(1), 99–109. <https://doi.org/10.1086/303216>
- McGraw, K. J. (2005). The antioxidant function of many animal pigments: Are there consistent health benefits of sexually selected colourants? *Animal Behaviour*, 69(4), 757–764. <https://doi.org/10.1016/j.anbehav.2004.06.022>
- McGraw, K. J., & Nogare, M. C. (2004). Carotenoid pigments and the selectivity of psittacofulvin-based



- coloration systems in parrots. *Comparative Biochemistry and Physiology - B Biochemistry and Molecular Biology*, 138(3), 229–233. <https://doi.org/10.1016/j.cbpc.2004.03.011>
- McNaught, M. K., & Owens, I. P. F. (2002). Interspecific variation in plumage colour among birds: Species recognition or light environment? *Journal of Evolutionary Biology*, 15(4), 505–514. <https://doi.org/10.1046/j.1420-9101.2002.00431.x>
- Miller, E. T., Leighton, G. M., Freeman, B. G., Lees, A. C., & Ligon, R. A. (2019). Ecological and geographical overlap drive plumage evolution and mimicry in woodpeckers. *Nature Communications*, 10(1602). <https://doi.org/10.1038/s41467-019-09721-w>
- Møller, A. P., & Birkhead, T. R. (1993). Cuckoldry and Sociality: A Comparative Study of Birds. *The American Naturalist*, 142(1), 118–140. <https://doi.org/10.1086/285531>
- Møller, A. P., & Birkhead, T. R. (1994). The Evolution of Plumage Brightness in Birds is Related to Extrapair Paternity. *Evolution*, 48(4), 1089–1100. <https://doi.org/10.1111/j.1558-5646.1994.tb05296.x>
- Møller, A. P., & Pomiankowski, A. (1993). Why have birds got multiple sexual ornaments? *Behavioral Ecology and Sociobiology*, 32(3), 167–176. <https://doi.org/10.1007/BF00173774>
- Owens, I. P. F., & Hartley, I. R. (1998). Sexual dimorphism in birds: why are there so many different forms of dimorphism? *Proceedings of the Royal Society B: Biological Sciences*, 265(1394), 397–407. <https://doi.org/10.1098/rspb.1998.0308>
- Pagel, M. (1999, October 28). Inferring the historical patterns of biological evolution. *Nature*. <https://doi.org/10.1038/44766>
- Pinkert, S., Brandl, R., & Zeuss, D. (2017). Colour lightness of dragonfly assemblages across North America and Europe. *Ecography*, 40(9), 1110–1117. <https://doi.org/10.1111/ecog.02578>
- R Development Core Team. (2019). R. A language and environment for statistical computing. R Foundation for Statistical Computing. Vienna, Austria.
- Rensch, B. (1936). Studien über klimatische parallelität der markmalausprägung bei Vögeln und saugern. *Archiv Für Naturgeschichte, (N.F.)*(5), 317–363.



- Revell, L. J. (2012). phytools: An R package for phylogenetic comparative biology (and other things). *Methods in Ecology and Evolution*, 3(2), 217–223. <https://doi.org/10.1111/j.2041-210X.2011.00169.x>
- Ribot, R. F. H., Berg, M. L., Schubert, E., Endler, J. A., & Bennett, A. T. D. (2019). Plumage coloration follows Gloger's rule in a ring species. *Journal of Biogeography*, 46(3), 584–596. <https://doi.org/10.1111/jbi.13497>
- Ricklefs, R. E. (2010, April). Insights from comparative analyses of aging in birds and mammals. *Aging Cell*. <https://doi.org/10.1111/j.1474-9726.2009.00542.x>
- Rubenstein, D. R., & Lovette, I. J. (2009). Reproductive skew and selection on female ornamentation in social species. *Nature*, 462(7274), 786–789. <https://doi.org/10.1038/nature08614>
- Rubolini, D., Liker, A., Garamszegi, L. Z., Møller, A. P., & Saino, N. (2015). Using the birdtree.org website to obtain robust phylogenies for avian comparative studies: A primer. *Current Zoology*, 61(6), 959–965. <https://doi.org/10.1093/czoolo/61.6.959>
- Santana, S. E., Alfaro, J. L., Noonan, A., & Alfaro, M. E. (2013). Adaptive response to sociality and ecology drives the diversification of facial colour patterns in catarrhines. *Nature Communications*, 4. <https://doi.org/10.1038/ncomms3765>
- Stradi, R., Pini, E., & Celentano, G. (2001). The chemical structure of the pigments in *Ara macao* plumage. *Comparative Biochemistry and Physiology - B Biochemistry and Molecular Biology*, 130(1), 57–63. [https://doi.org/10.1016/S1096-4959\(01\)00402-X](https://doi.org/10.1016/S1096-4959(01)00402-X)
- Sukumaran, J., & Holder, M. T. (2010). DendroPy: A Python library for phylogenetic computing. *Bioinformatics*, 26(12), 1569–1571. <https://doi.org/10.1093/bioinformatics/btq228>
- Taysom, A. J., Stuart-Fox, D., & Cardoso, G. C. (2011). The contribution of structural-, psittacofulvin- and melanin-based colouration to sexual dichromatism in Australasian parrots. *Journal of Evolutionary Biology*, 24(2), 303–313. <https://doi.org/10.1111/j.1420-9101.2010.02166.x>
- Tella, J. L., Figuerola, J., Negro, J. J., Blanco, G., Rodríguez-Estrella, R., Forero, M. G., ... Hiraldo, F. (2004). Ecological, morphological and phylogenetic correlates of interspecific variation in plasma

carotenoid concentration in birds. *Journal of Evolutionary Biology*, 17(1), 156–164.

<https://doi.org/10.1046/j.1420-9101.2003.00634.x>

Tkalčič, M., & Tasič, J. F. (2003). Colour spaces - Perceptual, historical and applicational background. In *IEEE Region 8 EUROCON 2003: Computer as a Tool - Proceedings* (Vol. A, pp. 304–308). IEEE.

<https://doi.org/10.1109/EURCON.2003.1248032>

Toft, C. A., & Wright, T. F. (2015). *Parrots of the Wild: A Natural History of the World's Most Captivating Birds*. University of California Press.

Valcu, M., & Dale, J. (2014). colorZapper: color extraction utilities. R package version 1.0.

Valcu, M., Dale, J., & Kempnaers, B. (2012). RangeMapper: A platform for the study of macroecology of life-history traits. *Global Ecology and Biogeography*, 21(9), 945–951.

<https://doi.org/10.1111/j.1466-8238.2011.00739.x>

Wasser, D. E., & Sherman, P. W. (2010). Avian longevities and their interpretation under evolutionary theories of senescence. *Journal of Zoology*, 280(2), 103–155. <https://doi.org/10.1111/j.1469-7998.2009.00671.x>

West-Eberhard, M. J. (1983). Sexual selection, social competition, and speciation. *Quarterly Review of Biology*, 58(2), 155–183. <https://doi.org/10.1086/413215>

Willson, M. F., & von Neumann, R. A. (1972). Why are neotropical birds more colorful than North American birds? *The Avicultural Magazine*, 78, 141–147.

Winemiller, K. O. (1992). Life-History Strategies and the Effectiveness of Sexual Selection. *Oikos*, 63(2), 318–327. <https://doi.org/10.2307/3545395>

Zeileis, A., Fisher, J. C., Hornik, K., Ihaka, R., McWhite, C. D., Murrell, P., ... Wilke, C. O. (2019). colorspace: A Toolbox for Manipulating and Assessing Colors and Palettes. Retrieved from <http://arxiv.org/abs/1903.06490>

Zink, R. M., & Remsen, J. V. (1986). Evolutionary processes and patterns of geographic variation in birds. *Current Ornithology*, 4(January 1986), 1–69.

## Figures

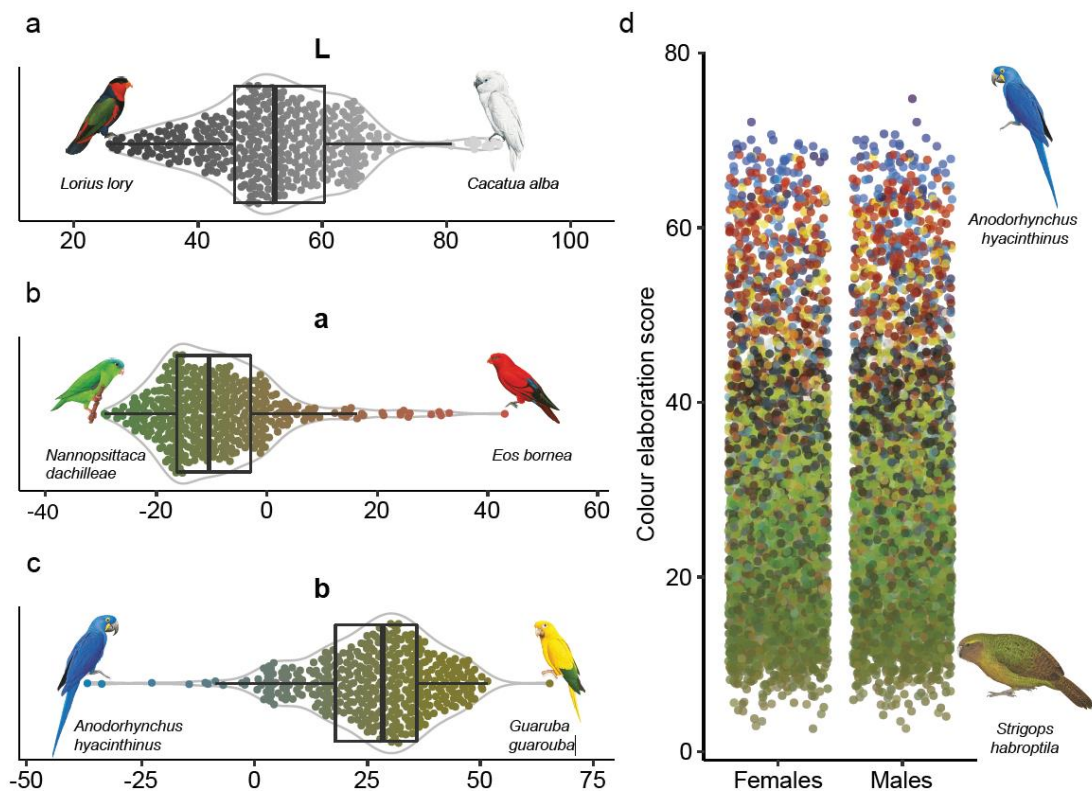

**Figure 1.** Illustration of the plumage colour scores for 398 parrot species. **a** *L*-score distribution showing dark to light colours, **b** *a*-score distribution showing green to red colours, **c** *b*-score distribution showing blue to yellow colours, and **d** colour elaboration score of females and males showing the distribution from the average colour (greenish brown) to highly elaborate colours such as red, blue, yellow, black and white. Illustrations in each panel represent the species that have the minimum and maximum scores for each variable. **a-c**, shown are box plots with median (vertical line) and interquartile range (box), and violin plots (grey lines) showing the probability density of the data. The dots in **a-c** represent the colour of each species for each colour coordinate (averaged across 12 body patches). To show the colour score of each species on the *L*, *a* and *b* coordinates separately, variation in the focal colour coordinate is shown while the other two colour coordinates were fixed (**a**,  $a = 0$ ,  $b = 0$ ; **b**,  $L = 50$ ,  $b = 26.4$  (mean score for all species); **c**,  $L = 50$ ,  $a = -8.8$  (mean score for all species)). Illustrations © Lynx Edicions.

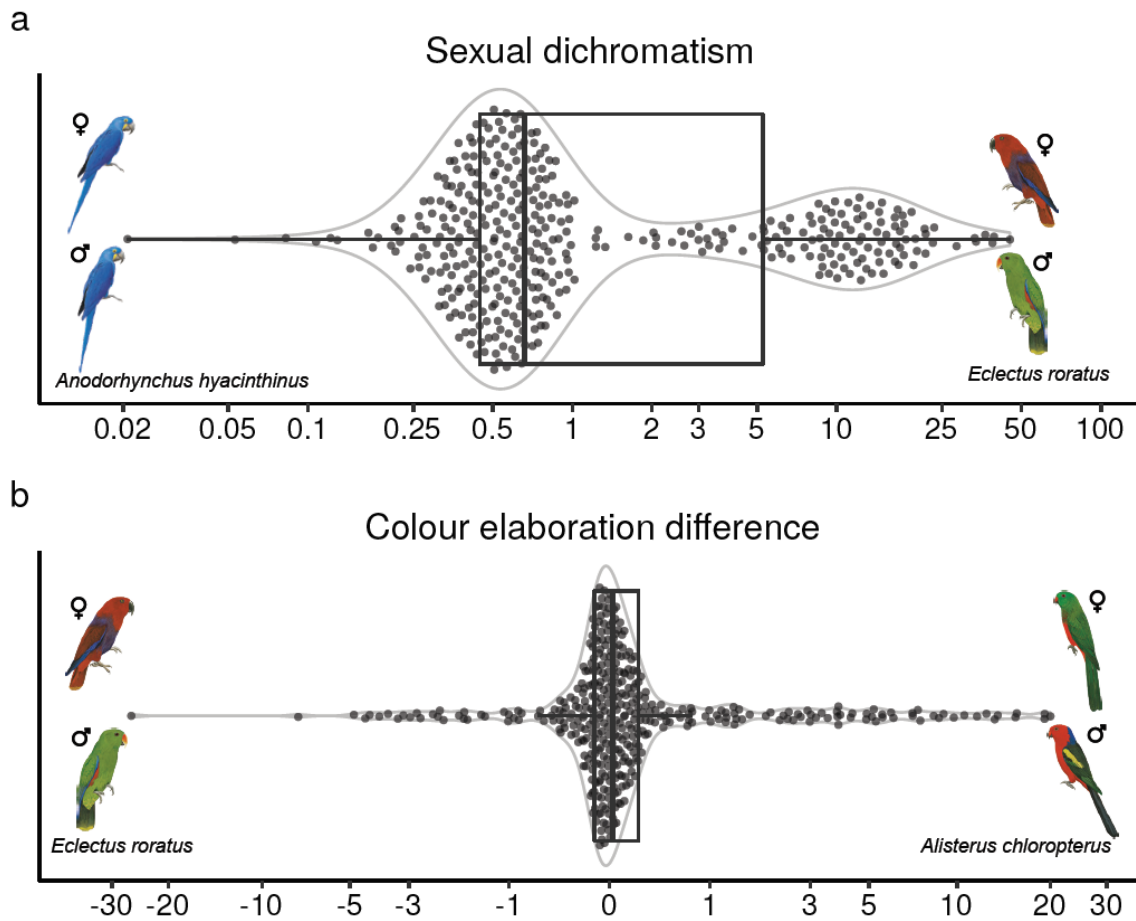

**Figure 2.** Illustration of sexual differences in colouration for 398 parrot species. **a** Distribution of the sexual dichromatism score, **b** distribution of sexual differences in colour elaboration. X-axes scales are log<sub>10</sub> transformed and log<sub>10</sub>-modulus transformed ( $\text{sign}(x) \cdot \log_{10}(\text{abs}(x)+1)$ , John and Draper, 1980) for negative values. Illustrations in each panel represent the species that have the minimum and maximum scores for each variable. Shown are box plots with median (vertical line) and interquartile range (box), and violin plots (grey lines) showing the probability density of the data. Illustrations © Lynx Edicions.

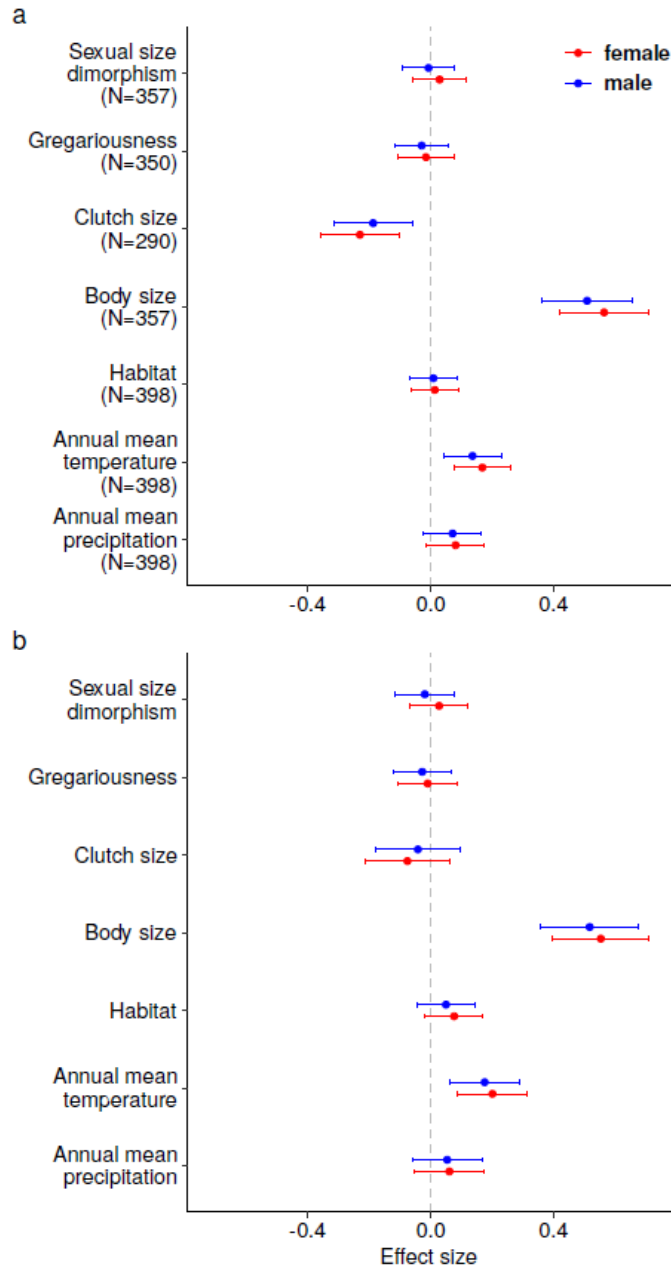

**Figure 3.** Effect sizes of predictors of colour elaboration based on **a** single predictor models and **b** a multiple predictor model ( $N = 273$  species). Red denotes females and blue refers to males. Shown are the means of the model coefficients for the 1000 phylogenetic linear models and the corresponding 95% confidence intervals.  $N$  indicates the number of species included in the analyses (determined by data availability).

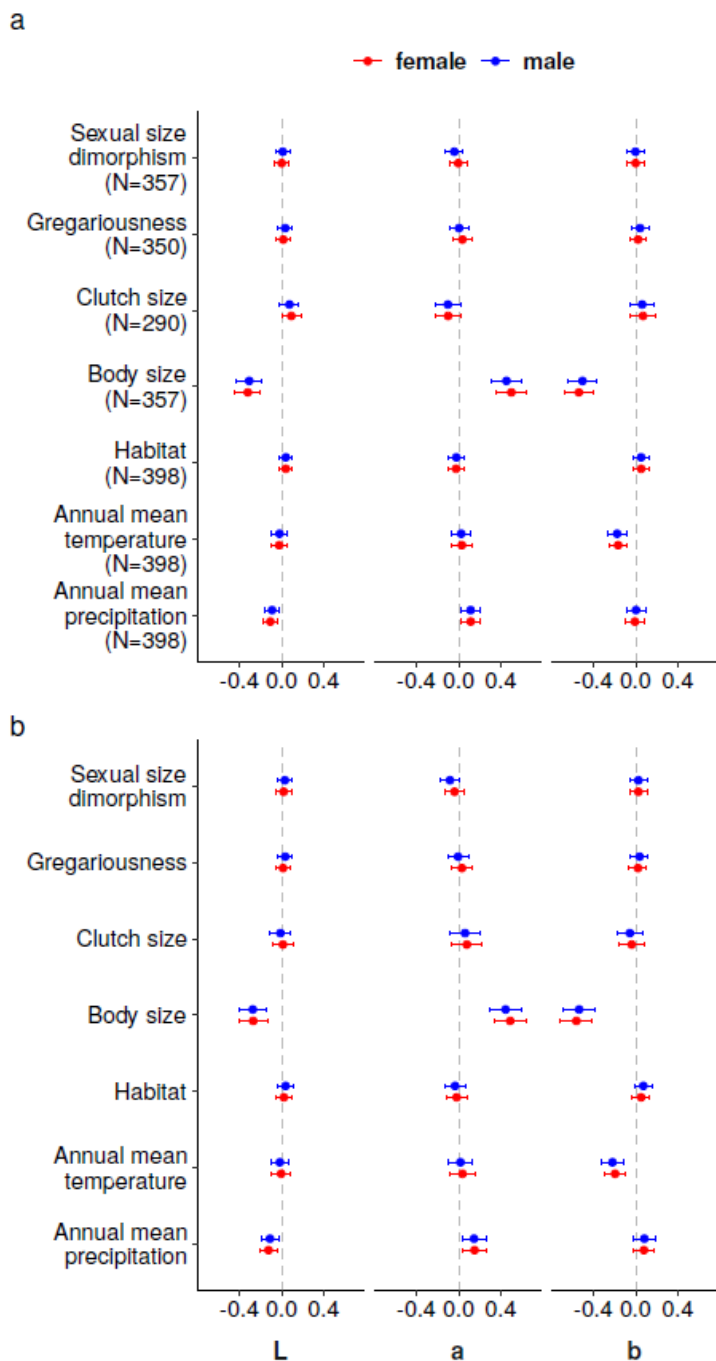

**Figure 4.** Effect sizes for each of the predictor variables on the three CIELAB colour coordinates ( $L$  = dark-to-light variation,  $a$  = green-to-red variation,  $b$  = blue-to-yellow variation), based on **a** single predictor models and **b** multiple predictor models ( $N = 273$  species). Red denotes females and blue refers to males. Shown are the means of the model coefficients for the 1000 phylogenetic linear models and the corresponding 95% confidence intervals.  $N$  indicates the number of species included in the analyses (determined by data availability).

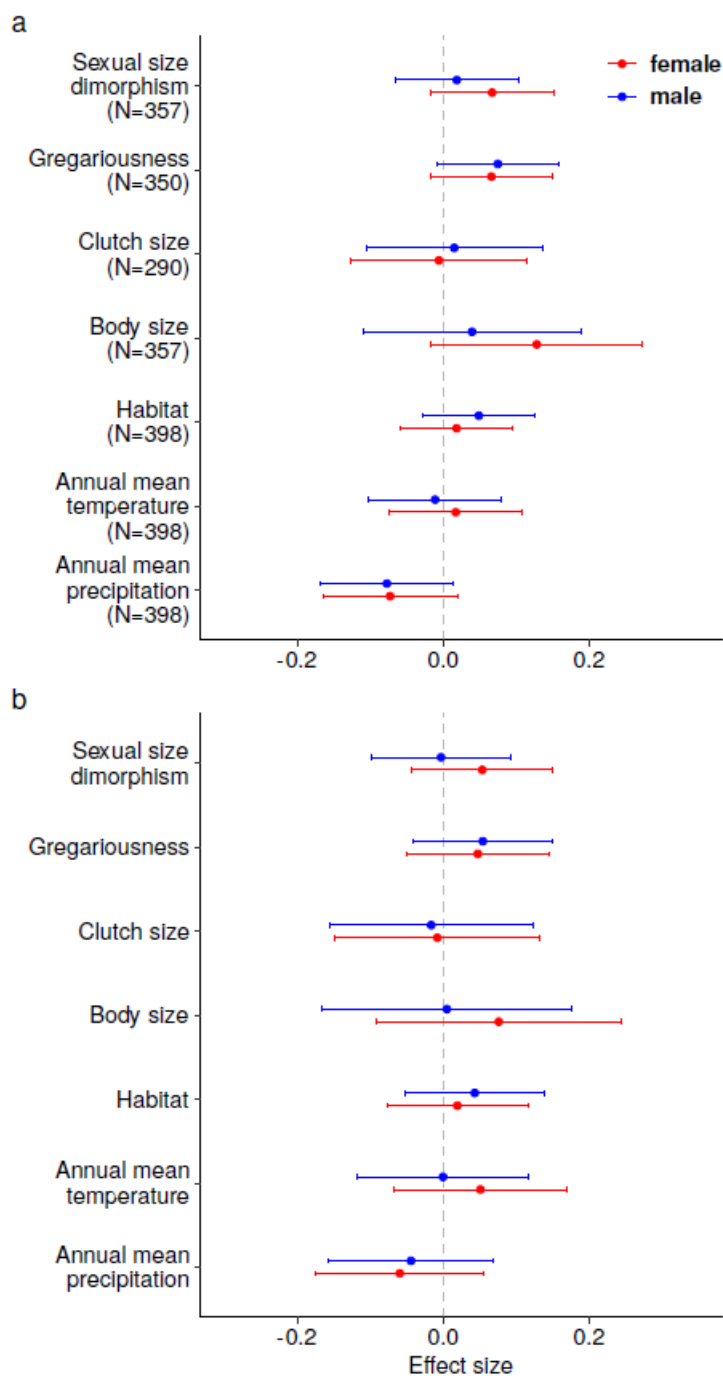

**Figure 5.** Effect sizes of predictors of colour diversity based on **a** single predictor models and **b** a multiple predictor model ( $N = 273$  species). Red denotes females and blue refers to males. Shown are the means of the model coefficients for the 1000 phylogenetic linear models and the corresponding 95% confidence intervals.  $N$  indicates the number of species included in the analyses (determined by data availability).

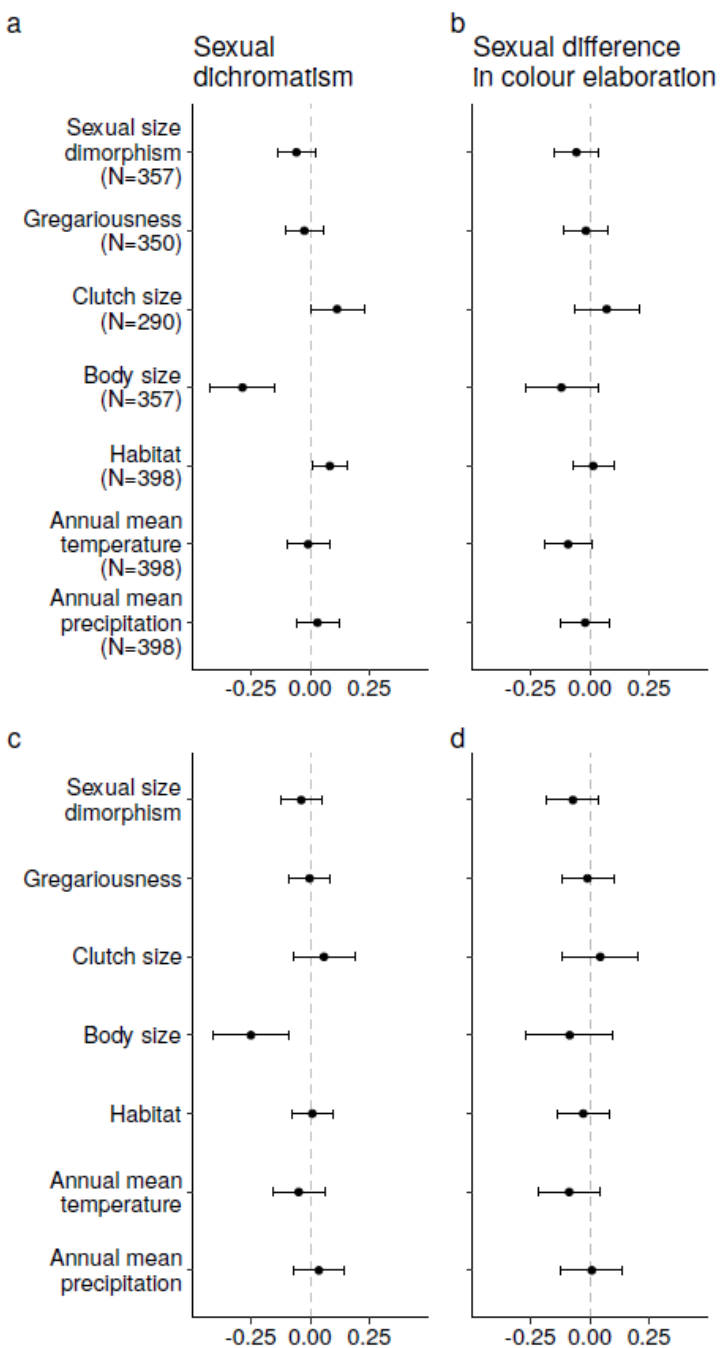

**Figure 6.** Effect sizes of predictors of difference in plumage colour between the sexes. Effect size of **a** sexual dichromatism and **b** sexual difference in colour elaboration based on single predictor models. Effect size of **c** sexual dichromatism and **d** sexual difference in colour elaboration based on multiple predictor models ( $N = 273$  species). Shown are the means of the model coefficients for the 1000 phylogenetic linear models and the corresponding 95% confidence intervals.  $N$  indicates the number of species included in the analyses (determined by data availability).



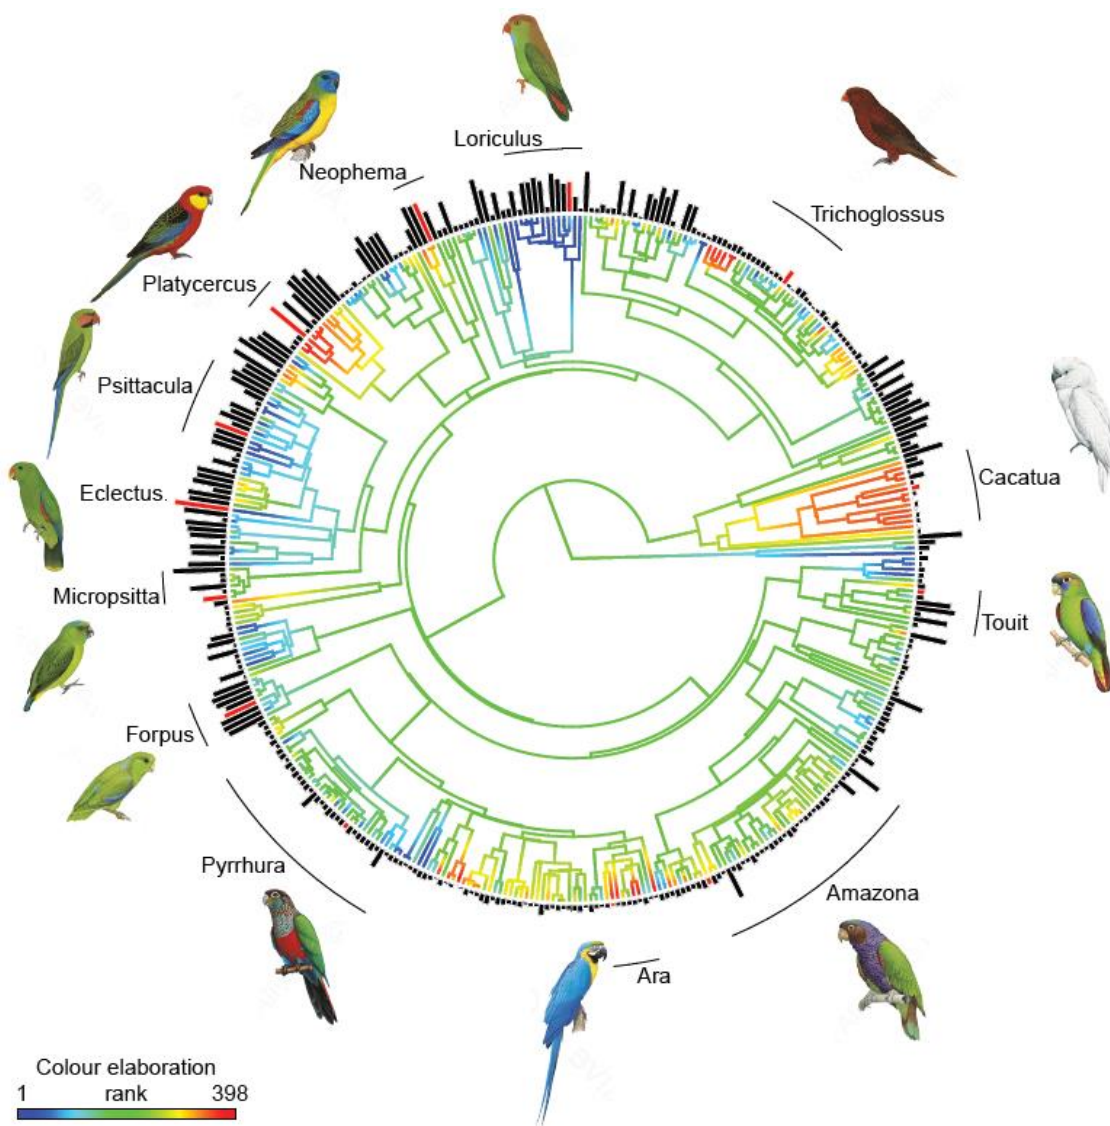

**Figure 7.** Parrots and cockatoos with more elaborate colours have lower levels of sexual dichromatism. Phylogeny of Psittaciformes depicting a reconstruction of evolutionary changes in male colour elaboration (branch colours, red = high, blue = low) using function *contMap* in R package “phytools” v.0.6-99 (Revell, 2012) and levels of sexual dichromatism (bar lengths at the tips). Note how species with low levels of colour elaboration have higher levels of sexual dichromatism. The plot is based on one phylogeny in the sample, but comparative analyses were carried out on 1000 phylogenetic reconstructions to account for phylogenetic uncertainty. Selected genera have been highlighted and species in illustrations are represented with red bars. Illustrations © Lynx Edicions.
